# Supplementary material for: Therapeutic effects of Balanites aegyptiaca DEL extract on diabetes mellitus: a systematic review
Source: Frontiers journal article supplement (doi:10.3389/fcdhc.2025.1651789), 2025-09-02
Supplement: Supplementary_file_1.pdf [file Supplementary_file_1.pdf]

The PRISMA flow chart for our study is presented in Fig 2

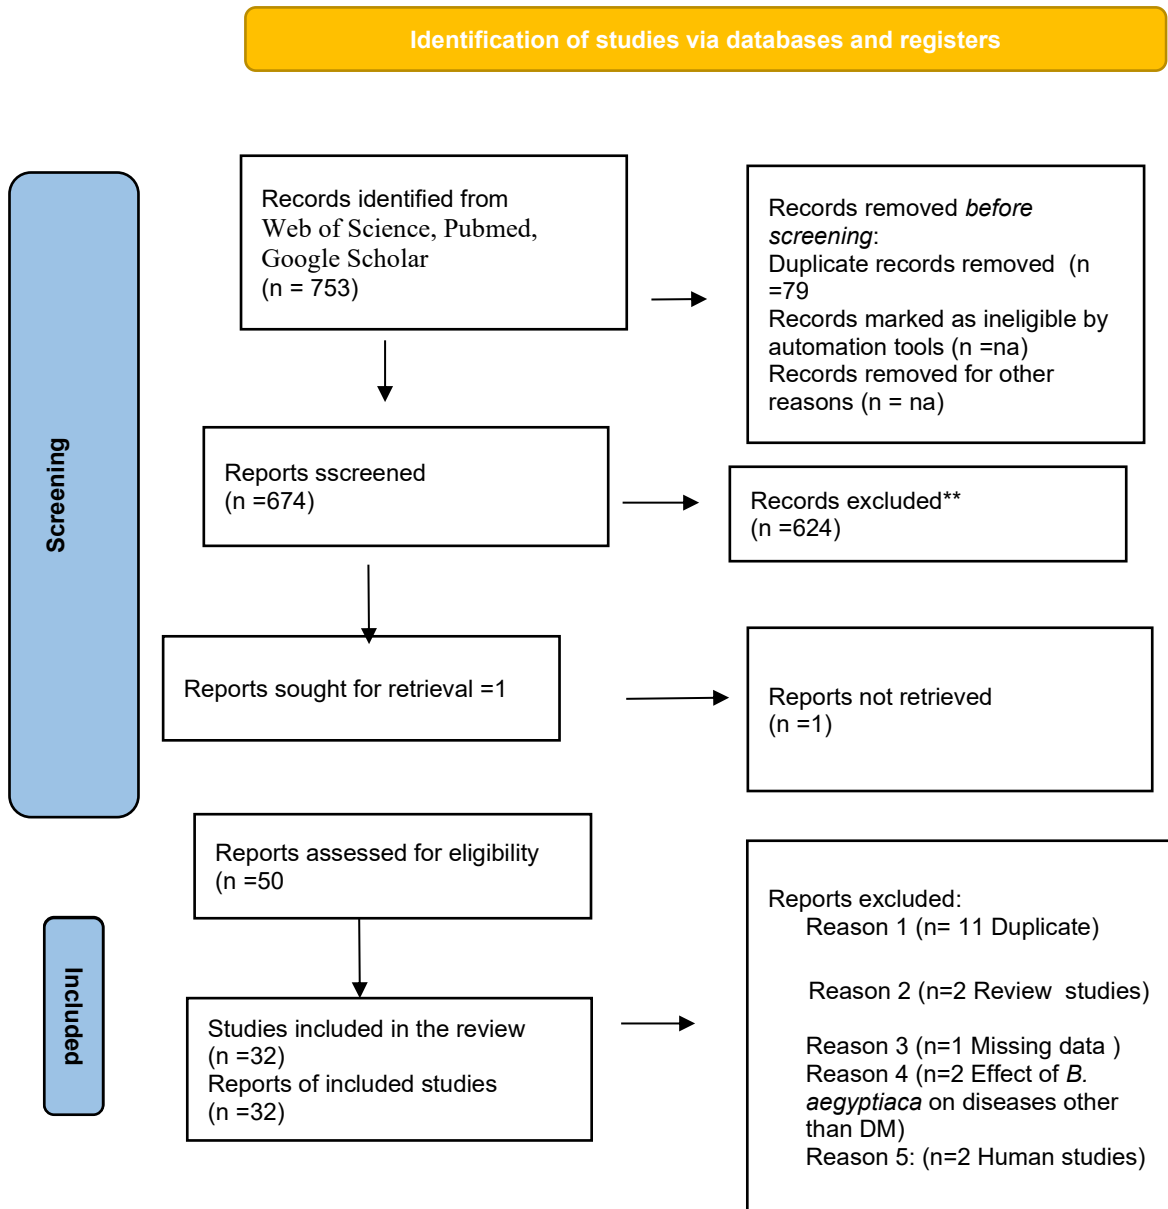

**Fig 2. PRISMA flow diagram of the process of study identification and selection**
